# Supplementary material
Source: PubMed Central journal article supplement (PMC11180426)
Supplement: NIHMS1998788-supplement-Supplementary_Materials.pdf [file NIHMS1998788-supplement-Supplementary_Materials.pdf]

---

# Cancer therapy with antibodies

---

In the format provided by the  
authors and unedited

## Supplementary Tables

| Generic name                      | Brand name                       | Target     | Format                         | First approval indication                                 | EMA approval | US FDA approval |
|-----------------------------------|----------------------------------|------------|--------------------------------|-----------------------------------------------------------|--------------|-----------------|
| Rituximab                         | MabThera, Rituxan                | CD20       | Chimeric IgG1                  | Non-Hodgkin lymphoma                                      | 1998         | 1997            |
| Trastuzumab                       | Herceptin                        | HER2       | Humanized IgG1                 | Breast cancer                                             | 2000         | 1998            |
| Gemtuzumab ozogamicin             | Mylotarg                         | CD33       | Humanized IgG4; ADC            | Acute myeloid leukemia                                    | 2018         | 2017; 2000#     |
| Ibritumomab tiuxetan              | Zevalin                          | CD20       | Murine IgG1                    | Non-Hodgkin lymphoma                                      | 2004         | 2002            |
| Tositumomab- I131                 | Bexxar                           | CD20       | Murine IgG2a                   | Non-Hodgkin lymphoma                                      | NA           | 2003            |
| Cetuximab                         | Erbix                            | EGFR       | Chimeric IgG1                  | Colorectal cancer                                         | 2004         | 2004            |
| Bevacizumab                       | Avastin                          | VEGF       | Humanized IgG1                 | Colorectal cancer                                         | 2005         | 2004            |
| Panitumumab                       | Vectibix                         | EGFR       | Human IgG2                     | Colorectal cancer                                         | 2007         | 2006            |
| Catumaxomab                       | Removab                          | EPCAM/CD3; | Rat/murine bispecific mAb      | Malignant ascites                                         | 2009#        | NA              |
| Ofatumumab                        | Arzerra                          | CD20       | Human IgG1                     | Chronic lymphocytic leukemia                              | 2010#        | 2009            |
| Ipilimumab                        | Yervoy                           | CTLA-4     | Human IgG1                     | Metastatic melanoma                                       | 2011         | 2011            |
| Brentuximab vedotin               | Adcetris                         | CD30       | Chimeric IgG1; ADC             | Hodgkin lymphoma, systemic anaplastic large cell lymphoma | 2012         | 2011            |
| Pertuzumab                        | Perjeta                          | HER2       | humanized IgG1                 | Breast Cancer                                             | 2013         | 2012            |
| Ado-trastuzumab emtansine         | Kadcyla                          | HER2       | humanized IgG1; ADC            | Breast cancer                                             | 2013         | 2012            |
| Obinutuzumab                      | Gazyva, Gazyvaro                 | CD20       | Humanized IgG1 Glycoengineered | Chronic lymphocytic leukemia                              | 2014         | 2013            |
| Ramucirumab                       | Cyramza                          | VEGFR2     | Human IgG1                     | Gastric cancer                                            | 2014         | 2014            |
| Nivolumab                         | Opdivo                           | PD-1       | Human IgG4                     | Melanoma, non-small cell lung cancer                      | 2015         | 2014            |
| Pembrolizumab                     | Keytruda                         | PD-1       | Humanized IgG4                 | Melanoma                                                  | 2015         | 2014            |
| Blinatumomab                      | Blinicyto                        | CD19       | Murine bispecific tandem scFv  | Acute lymphoblastic leukemia                              | 2015         | 2014            |
| Alemtuzumab                       | Lemtrada; MabCampath, Campath-1H | CD52       | Humanized IgG1                 | Multiple sclerosis; chronic myeloid leukemia#             | 2013; 2001#  | 2014; 2001#     |
| Necitumumab                       | Portrazza                        | EGFR       | Human IgG1                     | Non-small cell lung cancer                                | 2015         | 2015            |
| Dinutuximab                       | Qarziba; Unituxin                | GD2        | Chimeric IgG1                  | Neuroblastoma                                             | 2017; 2015#  | 2015            |
| Daratumumab                       | Darzalex                         | CD38       | Human IgG1                     | Multiple myeloma                                          | 2016         | 2015            |
| Elotuzumab                        | Empliciti                        | SLAMF7     | Humanized IgG1                 | Multiple myeloma                                          | 2016         | 2015            |
| Atezolizumab                      | Tecentriq                        | PD-L1      | Humanized IgG1                 | Bladder cancer                                            | 2017         | 2016            |
| Inotuzumab ozogamicin             | BESPOUSA                         | CD22       | Humanized IgG4; ADC            | Acute lymphoblastic leukemia                              | 2017         | 2017            |
| Avelumab                          | Bavencio                         | PD-L1      | Human IgG1                     | Merkel cell carcinoma                                     | 2017         | 2017            |
| Durvalumab                        | IMFINZI                          | PD-L1      | Human IgG1                     | Bladder cancer                                            | 2018         | 2017            |
| Mogamulizumab, mogamulizumab-kpkc | Poteligeo                        | CCR4       | Humanized IgG1                 | Mycosis fungoides or Sézary syndrome                      | 2018         | 2018            |

|                               |                                         |             |                                      |                                                               |      |      |
|-------------------------------|-----------------------------------------|-------------|--------------------------------------|---------------------------------------------------------------|------|------|
| Cemiplimab, cemiplimab-rwlc   | Libtayo                                 | PD-1        | Human mAb IgG4                       | Cutaneous squamous cell carcinoma                             | 2019 | 2018 |
| Moxetumomab pasudotox,        | Lumoxiti                                | CD22        | Murine IgG1 dsFv immunotoxin         | Hairy cell leukemia                                           | 2021 | 2018 |
| Polatuzumab vedotin           | Polivy                                  | CD79B       | Humanized IgG1 ADC                   | Diffuse large B-cell lymphoma                                 | 2020 | 2019 |
| Enfortumab vedotin            | Padcev                                  | Nectin-4    | Human IgG1 ADC                       | Urothelial cancer                                             | 2022 | 2019 |
| trastuzumab deruxtecan,       | Enhertu                                 | HER2        | Humanized IgG1 ADC                   | HER2+ metastatic breast cancer                                | 2021 | 2019 |
| Isatuximab, isatuximab-irfc   | Sarclisa                                | CD38        | Chimeric IgG1                        | Multiple myeloma                                              | 2020 | 2020 |
| Belantamab mafodotin          | BLENREP                                 | BCMA        | Humanized IgG1 ADC                   | Multiple myeloma                                              | 2020 | 2020 |
| Sacituzumab govitecan         | TRODELVY                                | TROP-2      | Humanized IgG1 ADC                   | Triple-neg. breast cancer                                     | 2021 | 2020 |
| Tafasitamab, tafasitamab-cxix | Monjuvi, Minjuvi                        | CD19        | Humanized IgG1                       | Diffuse large B-cell lymphoma                                 | 2021 | 2020 |
| Dostarlimab, dostarlimab-gxly | Jemperli                                | PD-1        | Humanized IgG4                       | Endometrial cancer                                            | 2021 | 2021 |
| Amivantamab, amivantamab      | Rybrevant                               | EGFR, cMET  | Human bispecific IgG1                | NSCLC w/ EGFR exon 20 insertion mutations                     | 2021 | 2021 |
| Loncastuximab tesirine        | Zynlonta                                | CD19        | Humanized IgG1 ADC                   | Diffuse large B-cell lymphoma                                 | 2022 | 2021 |
| Naxitamab-gqgk                | DANYELZA                                | GD2         | Humanized IgG1                       | High-risk neuroblastoma and refractory osteomedullary disease | NA   | 2020 |
| Margetuximab-cmkb             | MARGENZA                                | HER2        | Chimeric IgG1                        | HER2+ metastatic breast cancer                                | NA   | 2020 |
| Tisotumab vedotin,            | TIVDAK                                  | TF          | Human IgG1 ADC                       | Cervical cancer                                               | NA   | 2021 |
| Tebentafusp, tebentafusp-tebn | KIMMTRAK                                | GP100       | Humanized bispecific immunoconjugate | Metastatic uveal melanoma                                     | 2022 | 2022 |
| Relatlimab                    | Opdualag (relatlimab + nivolumab combo) | LAG-3       | Human IgG4                           | Melanoma                                                      | 2022 | 2022 |
| Mosunetuzumab                 | Lunsumio                                | CD20        | Humanized IgG1 bispecific            | Follicular lymphoma                                           | 2022 | 2022 |
| Teclistamab                   | TECVAYLI                                | BCMA        | Humanized/human bispecific IgG4      | Multiple myeloma                                              | 2022 | 2022 |
| Mirvetuximab soravtansine     | Elahere                                 | FR $\alpha$ | Humanized IgG1 ADC                   | Ovarian cancer                                                | NA   | 2022 |
| Tremelimumab                  | Imjudo                                  | CTLA-4      | Human IgG2                           | Antineoplastic; liver cancer                                  | 2023 | 2022 |
| Retifanlimab                  | Zynyz                                   | PD-1        | Humanized IgG4                       | Merkel cell carcinoma                                         | NA   | 2023 |
| Tislelizumab                  | Tevimbra                                | PD-1        | Humanized IgG4                       | Esophageal squamous cell                                      | 2023 | NA   |
| Glofitamab                    | Columvi                                 | CD20        | Humanized bispecific 2+1 IgG1        | Lymphoma                                                      | 2023 | 2023 |
| Epcoritamab                   | Epkinly                                 | CD20        | Humanized bispecific IgG1            | Lymphoma                                                      | 2023 | 2023 |
| Talquetamab                   | Talvey                                  | GPRC5D      | Humanized IgG4 bispecific            | Multiple myeloma                                              | 2023 | 2023 |

|             |          |      |                           |                                                                 |        |      |
|-------------|----------|------|---------------------------|-----------------------------------------------------------------|--------|------|
| Elrantamab  | Elrexio  | BCMA | Humanized IgG2 bispecific | Multiple myeloma                                                | Review | 2023 |
| Toripalimab | Loqtorzi | PD-1 | Humanized IgG4            | Nasopharyngeal carcinoma,<br>esophageal squamous cell carcinoma | Review | 2023 |

**Supplementary Table 1: Antibody-drugs approved in the US and/or EU arranged by first approval date.** ADCs (green), checkpoint blockers (red), immunotoxins (purple), radio-isotope conjugates (yellow) and bispecific antibodies (blue). Edrecolomab, olaratumab had very limited clinical use and were subsequently withdrawn either due to commercial reasons or due to lack of efficacy, and are not shown in the table. Data sourced from the Antibody Society.

| Drug Code(s)                                | INN           | Target       | Trial Phase | Clinical Study Indications                                                                                                            |
|---------------------------------------------|---------------|--------------|-------------|---------------------------------------------------------------------------------------------------------------------------------------|
| <b>Monospecific antibodies</b>              |               |              |             |                                                                                                                                       |
| Mab-B43.13                                  | Oregovomab    | CA125        | Phase 3     | Ovarian cancer (NCT04498117)                                                                                                          |
| MIL62                                       |               | CD20         | Phase 3     | Follicular lymphoma and marginal zone lymphoma (NCT04834024)                                                                          |
| TJ202, MOR202, MOR03087                     | Felzartamab   | CD38         | Phase 3     | Multiple myeloma (NCT03952091)                                                                                                        |
| ABBV-IMAB-TJC4, TJ011133, TJ133, TJC4       | Lemzoparlimab | CD47         | Phase 3     | Myelodysplastic Syndromes (MDS) (NCT05709093)                                                                                         |
| ONO-7913, Hu5F9-G4                          | Magrolimab    | CD47         | Phase 3     | Myelodysplastic syndromes (NCT04313881); Acute myeloid leukemia (NCT04778397, NCT05079230)                                            |
| MEDI9447                                    | Oleclumab     | CD73         | Phase 3     | Non-small cell lung cancer (NCT05221840)                                                                                              |
| FG-M108, M108                               |               | Claudin-18.2 | Phase 3     | Gastric or gastroesophageal junction adenocarcinoma (NCT06177041)                                                                     |
| IMAB 362                                    | Zolbetuximab  | Claudin-18.2 | Phase 3     | Gastric or gastro-oesophageal junction adenocarcinoma (NCT03504397)                                                                   |
| FG-3019                                     | Pamrevlumab   | CTGF         | Phase 3     | Pancreatic cancer (NCT03941093, NCT04229004)                                                                                          |
| RO5509554, RG7155                           | Emactuzumab   | CSF-1R       | Phase 3     | Tenosynovial giant cell tumor (NCT05417789)                                                                                           |
| JCT205, INBRX-109                           | Ozekibart     | DR5          | Phase 2     | Conventional Chondrosarcoma (NCT04950075)                                                                                             |
| JMT101                                      | Becostatug    | EGFR         | Phase 2     | Non-small cell lung cancer (CTR20212469)                                                                                              |
| FPA144                                      | Bemarituzumab | FGFR2b       | Phase 3     | Gastric cancer/gastroesophageal junction adenocarcinoma (NCT05111626, NCT05052801)                                                    |
| IAH0968                                     |               | HER2         | Phase 2/3   | Colorectal Cancer (NCT05673512)                                                                                                       |
| APX003, BD0801, TK001, sevacizumab          | Suvemcitug    | VEGF         | Phase 3     | Ovarian cancer (NCT04908787)                                                                                                          |
| Kintuximab, gentuximab, cintuximab          |               | VEGFR2       | Phase 3     | Advanced gastric or gastroesophageal junction adenocarcinoma (CTR20220815)                                                            |
| Drug Code(s)                                | INN           | Target       | Trial Phase | Clinical Study Indications                                                                                                            |
| <b>Checkpoint inhibitors</b>                |               |              |             |                                                                                                                                       |
| JS004, TAB004                               | Tifcemalimab  | BTLA         | Phase 3     | Small cell lung cancer (NCT06095583)                                                                                                  |
| BNT316, ONC-392                             | Gotistobart   | CTLA-4       | Phase 3     | Non-small cell lung cancer (NCT05671510)                                                                                              |
| AGEN1181                                    | Botensilimab  | CTLA-4       | Phase 2     | Colorectal cancer (NCT05608044)                                                                                                       |
| BCD-217 in combo with prolgolimab; BCD-145; | Nurulimab     | CTLA-4       | Phase 3     | Melanoma (NCT05732805, NCT05751928)                                                                                                   |
| MK-1308, AK107                              | Quavonlimab   | CTLA-4       | Phase 3     | Renal cell carcinoma (NCT04736706, NCT05899049)                                                                                       |
| NN8765, IPH-2201, NNC141-0100               | Monalizumab   | NKG2A        | Phase 3     | Squamous Cell Carcinoma of the Head and Neck (NCT04590963); Non-small Cell Lung Cancer (NCT05221840)                                  |
| JNJ-63723283                                | Cetrelimab    | PD-1         | Phase 3     | Bladder cancer (NCT04658862, NCT05714202)                                                                                             |
| SCT-I10A, SCTI-10A                          | Finotonlimab  | PD-1         | Phase 2/3   | Hepatocellular carcinoma (NCT04560894); Non-small-cell lung cancer (NCT04171284); Head and neck squamous cell carcinoma (NCT04146402) |
| GB226                                       | Geptanolimab  | PD-1         | Phase 2     | Cervical cancer (NCT03808857)                                                                                                         |
| CS1003                                      | Nofazinlimab  | PD-1         | Phase 3     | Hepatocellular carcinoma (NCT04194775)                                                                                                |
| F520                                        | Rulonlimab    | PD-1         | Phase 2/3   | Hepatocellular carcinoma (NCT05408221)                                                                                                |
| PF-06801591                                 | Sasanlimab    | PD-1         | Phase 3     | Non-muscle invasive bladder cancer (NCT04165317)                                                                                      |
| BAT1308                                     |               | PD-1         | Phase 2/3   | Cervical cancer (NCT06123884 / CTR20232394)                                                                                           |
| AB154                                       | Domvanalimab  | TIGIT        | Phase 3     | Gastrointestinal tract adenocarcinoma (NCT05568095); Non-small cell lung cancer (NCT05211895, NCT05502237, NCT04736173)               |
| BGB-A1217                                   | Ociperlimab   | TIGIT        | Phase 3     | Non-small cell lung cancer (NCT04746924, NCT04866017)                                                                                 |
| MTIG7192A, RO7092284, RG6058                | Tiragolumab   | TIGIT        | Phase 3     | Non-small cell lung cancer (NCT04294810, NCT04513925, NCT04619797); Esophageal cancer (NCT04543617, NCT04540211)                      |
| MK-7684                                     | Vibostolimab  | TIGIT        | Phase 3     | Non-small cell lung cancer (NCT04738487; NCT05298423; NCT05226598); Small cell lung cancer (NCT05224141); Melanoma (NCT05665595)      |
| GSK4069889, TSR-022                         | Cobolimab     | TIM-3        | Phase 2/3   | Non-small cell lung cancer (NCT04655976)                                                                                              |

| Drug Code(s)                                       | INN                              | Target                   | Trial Phase | Clinical Study Indications                                                                                                |
|----------------------------------------------------|----------------------------------|--------------------------|-------------|---------------------------------------------------------------------------------------------------------------------------|
| <b>Bispecific antibodies</b>                       |                                  |                          |             |                                                                                                                           |
| ABBV-383                                           |                                  | BCMA, CD3                | Phase 3     | Multiple myeloma (NCT06158841)                                                                                            |
| REGN5458                                           | Linvoseltamab                    | BCMA, CD3                | Phase 2     | Multiple myeloma (NCT03761108, NCT05730036)                                                                               |
| REGN1979                                           | Odronektamab                     | CD20, CD3                | Phase 2     | Lymphoma (NCT03888105)                                                                                                    |
| AMG 757                                            | Tarlatamab                       | DLL3, CD3                | Phase 3     | Small-cell lung cancer (NCT05060016)                                                                                      |
| CTX-009, ES104, TR009, NOV1501, ABL001             |                                  | DLL4, VEGF               | Phase 2/3   | Biliary tract cancers (NCT05506943)                                                                                       |
| SI-B001                                            | Izalontamab                      | EGFR, HER3               | Phase 2/3   | Non-small cell lung cancer (NCT05020769)                                                                                  |
| ZW25                                               | Zanidatamab                      | HER2, HER2 (biparatopic) | Phase 2     | Biliary tract cancer (NCT04466891)                                                                                        |
| KN026                                              | Anbenitamab                      | HER2, HER2 (biparatopic) | Phase 2/3   | Gastric (NCT05427383), breast cancer (NCT05838066,)                                                                       |
| MCLA-128                                           | Zenocutuzumab                    | HER2, HER3               | Phase 2     | Neuregulin 1 fusion (NRG1+) cancer (NCT02912949)                                                                          |
| MEDI5752                                           | Volrustomig                      | PD-1, CTLA-4             | Phase 3     | Cervical cancer (NCT06079671); Non-small cell lung cancer (NCT05984277)                                                   |
| KN046                                              | Erfonrilimab                     | PD-L1, CTLA-4            | Phase 3     | Non-small-cell lung cancer (NCT04474119), Advanced Pancreatic Ductal Adenocarcinoma (NCT05149326)                         |
| PM8002                                             |                                  | PD-L1, VEGF              | Phase 2/3   | Non-small Cell Lung Cancer (NCT05756972); Small Cell Lung Cancer (NCT05844150)                                            |
| SHR-1701                                           | Retlirafusp alfa                 | PD-L1, TGF- $\beta$      | Phase 2/3   | Cervical cancer (NCT05179239); Colorectal cancer (NCT04856787); Gastric or gastroesophageal junction cancer (NCT04950322) |
| IMC-F106C                                          |                                  | PRAME, CD3               | Phase 3     | Melanoma (NCT06112314)                                                                                                    |
| AZD2936                                            | Rilvegostomig                    | TIGIT, PD-1              | Phase 3     | Biliary tract cancer (NCT06109779)                                                                                        |
| <b>Conjugated antibodies</b>                       |                                  |                          |             |                                                                                                                           |
|                                                    | Mecbotamab vedotin               | AXL                      | Phase 2     | Soft tissue and primary bone sarcoma (NCT03425279); Non-small Cell Lung Cancer (NCT04681131)                              |
| MGC018                                             | Vobramitamab duocarmazine        | B7-H3                    | Phase 2/3   | Prostate cancer (NCT05551117 TAMARACK)                                                                                    |
| DS-7300a                                           | Ifinatamab deruxtecan            | B7-H3                    | Phase 3     | Small cell lung cancer (NCT06203210)                                                                                      |
| IMGN632                                            | Pivekimab sunirine               | CD123                    | Phase 2     | Blastic plasmacytoid dendritic cell neoplasm (NCT03386513 CADENZA)                                                        |
| I-131-BC8, lomab-B                                 | Apamistamab-iodine (131I)        | CD45                     | Phase 3     | Acute myeloid leukemia (NCT02665065)                                                                                      |
| ABBV-399                                           | Telisotuzumab vedotin            | cMet                     | Phase 3     | Non-small cell lung cancer (NCT04928846)                                                                                  |
| MRG003                                             |                                  | EGFR                     | Phase 3     | Squamous Cell Carcinoma of the Head and Neck (NCT05751512)                                                                |
| L19TNF, L19(scFv)2-TNF                             | Onfekafusp alfa                  | Fibronectin (ED-B)       | Phase 3     | Soft tissue sarcoma (NCT04650984)                                                                                         |
| L19-IL2, L19-TNF                                   | Bifikafusp alfa, Onfekafusp alfa | Fibronectin (ED-B)       | Phase 3     | Melanoma (NCT03567889, NCT02938299)                                                                                       |
| STRO-002                                           | Luveltamab tazevibulin           | FR $\alpha$              | Phase 2/3   | Ovarian Cancer, Fallopian Tube Cancer (NCT05870748)                                                                       |
| PRO1184                                            | Rinatabart sesutecan             | FR $\alpha$              | Phase 2     | Ovarian cancer, endometrial cancer, breast cancer, non-small cell lung cancer, and mesothelioma (NCT05579366)             |
| SYD985                                             | Trastuzumab Duocarmazine         | HER2                     | Phase 3     | Metastatic breast cancer (NCT03262935)                                                                                    |
| ARX788                                             | Anvatabart opadotin              | HER2                     | Phase 2/3   | Breast cancer (NCT05426486)                                                                                               |
| IKS014, LCB14-0110, FS-1502, Trastuzumab mafodotin |                                  | HER2                     | Phase 3     | Breast cancer (NCT05755048)                                                                                               |
| SHR-A1811                                          | Trastuzumab rezetecan            | HER2                     | Phase 3     | Breast cancer (NCT05424835, NCT05814354)                                                                                  |
| DP303c                                             |                                  | HER2                     | Phase 3     | Breast cancer (NCT05901935)                                                                                               |
| MRG002                                             |                                  | HER2                     | Phase 2/3   | Breast Cancer (NCT04924699)                                                                                               |

|                                |                             |          |           |                                                                                                                                        |
|--------------------------------|-----------------------------|----------|-----------|----------------------------------------------------------------------------------------------------------------------------------------|
| U3-1402                        | Patritumab<br>deruxtecan    | HER3     | Phase 2/3 | Lung cancer (NCT04619004, NCT05338970 )                                                                                                |
| 9MW2821                        |                             | Nectin-4 | Phase 3   | Urothelial carcinoma (CTR20234024)                                                                                                     |
| TLX591, ATL-101, Lu-177-huJ591 | Rosopatamab<br>(177Lu-DOTA) | PSMA     | Phase 3   | Prostate cancer (NCT04876651)                                                                                                          |
| MK-2140                        | Zilovetamab<br>vedotin      | ROR1     | Phase 2/3 | Diffuse large B-cell lymphoma (NCT05139017)                                                                                            |
| DS-1062                        | Datopotamab<br>deruxtecan   | TROP-2   | Phase 3   | Non-small cell lung cancer (NCT05555732, NCT05215340, NCT04656652, NCT05687266); Breast cancer (NCT05374512, NCT05104866, NCT05629585) |

**Supplementary Table 2: Antibodies in the late stage of clinical development.** Data sourced from The Antibody Society. Antibody therapeutics in late-stage clinical studies. date accessed February 2<sup>nd</sup>, 2024. [www.antibodysociety.org/antibodies-in-late-stage-clinical-studies/](http://www.antibodysociety.org/antibodies-in-late-stage-clinical-studies/). International Nonproprietary Names (INN). Fibronectin extra-domain B (ED-B)
